# Supplementary material for: Effect of triclosan-coated sutures for abdominal wound closure on the incidence of abdominal wound dehiscence: a protocol for an individual participant data meta-analysis
Source: PubMed Central journal article supplement — BMJ Open. 2022 Feb 23;12(2):e054534. doi: 10.1136/bmjopen-2021-054534 (PMC8867322; doi:10.1136/bmjopen-2021-054534), 2022-02-23
Supplement: bmjopen-2021-054534supp001.pdf [file bmjopen-2021-054534supp001.pdf]

## Supplementary appendix 1: Search strategy

### PubMed:

("Triclosan"[Mesh] OR "Anti-Infective Agents, Local"[Mesh] OR triclosan\*[tiab] OR antimicrobial\*[tiab] OR antibacterial\*[tiab] OR antiseptic\*[tiab] OR antibiotic\*[tiab]) AND ("Sutures"[Mesh] OR "Polyglactin 910"[Mesh] OR "Polydioxanone"[Mesh] OR suture\*[tiab] OR vicryl\*[tiab] OR polyglactin\*[tiab] OR PDS II[tiab] OR polydioxanone\*[tiab]) AND ("Surgical Wound Infection"[Mesh] OR "Surgical Wound Dehiscence"[Mesh] OR surgical wound infection\*[tiab] OR surgical site infection\*[tiab] OR postoperative infection\*[tiab] OR surgical infection\*[tiab] OR wound infection\*[tiab] OR SSI[tiab] OR SSIs[tiab] OR abdominal wound dehiscence\*[tiab] OR abdominal wall dehiscence\*[tiab] OR fascial dehiscence\*[tiab] OR burst abdomen\*[tiab]) AND ("Randomized Controlled Trial" [Publication Type] OR "Controlled Clinical Trial" [Publication Type] OR "drug therapy" [Subheading] OR randomized [tiab] OR placebo[tiab] OR randomly[tiab] OR trial[tiab] OR groups[tiab]) NOT ("Animals"[Mesh] NOT "Humans"[Mesh])

### EMBASE:

(1) triclosan/ or exp topical antiinfective agent/ or (triclosan\* or antimicrobial\* or antibacterial\* or antiseptic\* or antibiotic\*).ti,ab,kw. (2) exp suture/ or polyglactin/ or polydioxanone/ or absorbable suture/ or poliglecaprone suture/ or polydioxanone suture/ or polyglactin suture/ or (suture\* or vicryl\* or polyglactin\* or PDS\*).ti,ab,kw. (3) wound infection/ or surgical infection/ or wound dehiscence/ or (surgical wound infection\* or surgical site infection\* or postoperative infection\* or surgical infection\* or wound infection\* or SSI or SSIs or abdominal wound dehiscence\* or abdominal wall dehiscence\* or fascial dehiscence\* or burst abdomen\*).ti,ab,kw. (4) randomized controlled trial/ or controlled clinical trial/ or drug therapy.fs. or (randomized or placebo or randomly or trial or groups).ti,ab,kw. (5) 1 and 2 and 3 and 4 (6) exp animal/ not human/ (7) 5 not 6 (8) limit 7 to conference abstract status (9) 7 not 8

### Cochrane Central Register of Controlled Trials:

(1) (triclosan\* or antimicrobial\* or antibacterial\* or antiseptic\* or antibiotic\*):ti,ab,kw (2) MeSH descriptor: [Anti-Infective Agents, Local] explode all trees (3) #1 or #2 (4) (suture\* or vicryl\* or polyglactin\* or polydioxanone or PDS\*):ti,ab,kw (5) (surgical wound infection\* or surgical site infection\* or postoperative infection\* or surgical infection\* or wound infection\* or SSI or SSIs or abdominal wound dehiscence\* or abdominal wall dehiscence\* or fascial dehiscence\* or burst abdomen\*):ti,ab,kw (6) #3 and #4 and #5 in Trial
