# Supplementary material for: Effect of triclosan-coated sutures for abdominal wound closure on the incidence of abdominal wound dehiscence: a protocol for an individual participant data meta-analysis
Source: PubMed Central journal article supplement — BMJ Open. 2022 Feb 23;12(2):e054534. doi: 10.1136/bmjopen-2021-054534 (PMC8867322; doi:10.1136/bmjopen-2021-054534), 2022-02-23
Supplement: bmjopen-2021-054534supp002.pdf [file bmjopen-2021-054534supp002.pdf]

## Supplementary appendix 2: Data items

| Study-level data       |                                                                                               |                                                                                                                  |
|------------------------|-----------------------------------------------------------------------------------------------|------------------------------------------------------------------------------------------------------------------|
| <b>Study design</b>    | Inclusion- and exclusion criteria                                                             | Text                                                                                                             |
|                        | Inclusion period                                                                              | Month/year – Month/year                                                                                          |
|                        | Number of participating centers                                                               | Number                                                                                                           |
|                        | Blinding                                                                                      | Open label / single / double / triple blind                                                                      |
|                        | Randomised tissue layer                                                                       | Fascia and / or skin wound                                                                                       |
|                        | TCS specification                                                                             | Polydioxanone / polyglactin 910                                                                                  |
|                        | Sample size                                                                                   | Number                                                                                                           |
|                        | Follow up                                                                                     | (days)                                                                                                           |
|                        | Primary and secondary outcomes                                                                | Text                                                                                                             |
|                        | Standardised use of prophylactic antibiotics                                                  | Yes / no                                                                                                         |
|                        |                                                                                               |                                                                                                                  |
| Participant-level data |                                                                                               |                                                                                                                  |
| <b>Baseline</b>        | Age                                                                                           | Year                                                                                                             |
|                        | Gender                                                                                        | Male or female                                                                                                   |
|                        | ASA Physical Status score                                                                     | Number                                                                                                           |
|                        | Body mass index                                                                               | Kg/m <sup>2</sup>                                                                                                |
|                        | Active cigarette smoking                                                                      | Yes / no                                                                                                         |
|                        | Diabetes mellitus (any type)                                                                  | Yes / no                                                                                                         |
|                        | Chronic obstructive pulmonary disease                                                         | Yes / no                                                                                                         |
|                        | Previous midline incision                                                                     | Yes / no (if yes: number)                                                                                        |
|                        |                                                                                               |                                                                                                                  |
| <b>Procedural</b>      | Randomisation allocation                                                                      | Intervention / control                                                                                           |
|                        | Received suture                                                                               | TCS / non-TCS                                                                                                    |
|                        | Status                                                                                        | Elective / emergent                                                                                              |
|                        | Target organ                                                                                  | Upper gastrointestinal / small intestine / colorectal / hepato-pancreato-biliary / other                         |
|                        | Wound classification                                                                          | According to the Center for Disease Control and Prevention classification                                        |
|                        | Duration of surgery                                                                           | According to hospital definition (min)                                                                           |
|                        | Incision type                                                                                 | Midline (at least partly) / non-midline                                                                          |
|                        |                                                                                               |                                                                                                                  |
| <b>Outcome</b>         | Spontaneous abdominal wound dehiscence, within 30 days after operation, requiring reoperation | Yes / no                                                                                                         |
|                        | Abdominal skin wound dehiscence                                                               | Yes / no                                                                                                         |
|                        | Surgical Site Infection                                                                       | According to the Center for Disease Control and Prevention classification into superficial, deep and organ space |
|                        | Postoperative length of hospital stay                                                         | (days)                                                                                                           |
|                        | All cause reoperation within 30 days after surgery                                            | Yes / no                                                                                                         |
|                        | All cause 30 days mortality                                                                   | Yes / no                                                                                                         |
